1

## 2 3.7 Å cryo-EM structure of the core Centromere Binding Factor 3 3 complex

4

5 Wenjuan Zhang<sup>1</sup>, Natalya Lukoynova<sup>1</sup>, Shomon Miah<sup>1</sup>, and Cara K. Vaughan<sup>\*1,2</sup>

6

7 <sup>1</sup> Institute of Structural and Molecular Biology, Birkbeck College, Malet Street, London,  
8 WC1E 7HX

9 <sup>2</sup> Institute of Structural and Molecular Biology, University College London, Gower Street,  
10 London, WC1E 6BT

11 \* Address correspondence to [c.vaughan@mail.cryst.bbk.ac.uk](mailto:c.vaughan@mail.cryst.bbk.ac.uk)

## 12 **Summary**

13 The Centromere Binding Factor 3 (CBF3) complex binds the third Centromere DNA Element in  
14 organisms with point centromeres, such as *S. cerevisiae*. It is the only essential centromere  
15 binding complex as it facilitates genetic specification of point centromeres. It is therefore the  
16 most fundamental complex of the kinetochore in these organisms and its association with  
17 centromere DNA allows association of all other kinetochore components. We have determined  
18 the atomic structure of the core complex of CBF3, comprising 3 of its 4 components, using cryo-  
19 EM. The architecture of the complex is 'U'-shaped, with a deep, strongly basic channel that is  
20 narrow at one end and wide at the other. Combining our structure and in vitro assays, we  
21 present a model for its association with centromere DNA.

## 22 **Introduction**

23 The integrity of genetic information passed through generations relies on faithful segregation of  
24 chromosomes during mitosis. The kinetochore, a mega-Dalton protein assembly, enables this  
25 segregation by specifically associating with both the centromere (CEN) of sister chromatids and  
26 the microtubules of the mitotic spindle. Most eukaryotes have regional centromeres with  
27 unique satellite repeat structures that vary in length but whose arrangement is largely  
28 conserved between chromosomes despite being unconserved in sequence. Regional  
29 centromeres are specified epigenetically, by the presence of an essential centromeric histone  
30 H3 variant, CENP-A, which is found at CEN DNA, where it is interspersed with canonical  
31 nucleosomes (Verdaasdonk and Bloom, 2011).

32 By contrast budding yeasts, including *S. cerevisiae*, have evolved point centromeres, comprising  
33 conserved, short and essential CEN DNA, comprising three Centromere DNA Elements (CDEs),  
34 typically of ~125 bp. Point centromeres evolved from an ancestor with an epigenetically-  
35 specified centromere (Malik and Henikoff, 2009) and this evolutionary transition introduced  
36 genetic specification of the centromere while retaining aspects of epigenetic specification, in  
37 particular the essential presence of the Cenp-A homologue, Cse4.

38 Unique to these organisms, the Centromere Binding Factor 3 (CBF3) complex provides a  
39 physical link between the genetic and epigenetic mechanisms of centromere specification. It  
40 associates specifically to the highly conserved CDEIII (Lechner and Carbon, 1991) and is  
41 responsible for deposition of Cse4, through a direct interaction with the Cse4 chaperone,  
42 Scm3/HJURP (Camahort et al., 2007). Its epigenetic role is emphasized by the observation that a  
43 synthetic kinetochore can be assembled in the absence of centromere DNA elements provided  
44 functional CBF3 is available to stabilise Cse4 incorporation at the centromere (Ho et al., 2014).

45 CBF3 comprises two homodimers, of Cep3 and Ndc10, and a Ctf13-Skp1 heterodimer. Cep3  
46 provides sequence specificity through binuclear zinc-cluster domains homologous to those  
47 found in GAL4-like fungal transcription factors (Lechner, 1994; MacPherson et al., 2006). These  
48 domains bind a pseudo TGT/CCG palindrome in CDEIII (Espelin et al., 1997). Ndc10 contributes  
49 both non-specific DNA-binding (Cho and Harrison, 2011; Espelin et al., 1997) and association  
50 with the centromeric histone chaperone, Scm3/HJURP (Camahort et al., 2007). The Skp1-Ctf13  
51 heterodimer interacts with both Cep3 and Ndc10 and interacts with CDEIII at a completely

52 conserved G centrally positioned between the binding sites for the binuclear zinc-cluster  
53 domains (Espelin et al., 1997).

54 The molecular mechanism of CBF3 association with CDEIII is unknown, despite a wealth of  
55 genetic and biochemical data and crystal structures of domains from individual components  
56 (Bellizzi et al., 2007; Cho and Harrison, 2011; Perriches and Singleton, 2012; Purvis and  
57 Singleton, 2007), due to an absence of atomic-resolution structural information for the CBF3  
58 complex as a whole.

59 Herein we present the cryo-EM structure of the CBF3 core complex (CBF3CC $\Delta$ N) at atomic  
60 resolution. The complex forms a deep channel that is both highly charged and strongly  
61 conserved, and is perfectly sized to accommodate DNA. The structure identifies structural  
62 elements from Ctf13 that contribute to DNA association and our in vitro experiments confirm  
63 this role and show that this association is sequence independent. The data allow us to present a  
64 model, which accounts for previously published cross-linking experiments and provides a high  
65 resolution view of the CBF3CC $\Delta$ N-CDEIII structure.

66

## 67 **Results**

### 68 Cryo-EM Studies of CBF3

69 Dissection of the assembly and turnover of CBF3 *in vivo* indicated that Cep3 and Ctf13 associate  
70 early in the CBF3 assembly pathway while association with Ndc10 occurred at much later time  
71 points (Rodrigo-Brenni et al., 2004). These results were in agreement with earlier *in vitro*  
72 reconstitution experiments (Russell et al., 1999) therefore we expressed and purified a CBF3  
73 core complex (CBF3CC) comprising the Ctf13-Skp1 heterodimer and the Cep3 homodimer  
74 (Figure 1A). Full length Cep3 rendered CBF3CC unstable, but the complex with an N-terminally  
75 truncated Cep3, in which the binuclear zinc cluster domains were missing, yielded a 220 kDa  
76 complex (CBF3CC $\Delta$ N) that was purified to homogeneity (Figure S1A) and was suitable for cryo-  
77 EM studies (Figure S1B). 2D-classification of motion-corrected cryo-EM images generated  
78 classes with clear secondary structural details (Figure S1C) that enabled *de novo* reconstruction  
79 of a 3D map. After refinement, the final 3.7 Å map comprised 187606 particles with good  
80 angular distribution (Figure S1D), judged using the FSC gold standard method (Figure S1E). The  
81 final map has a horseshoe shape with a deep central channel (Figure 1B).

### 82 Atomic Model of CBF3CC $\Delta$ N

83 Secondary structure details and side chains were clearly visible throughout the map (Figures 1C-  
84 F) enabling an atomic model of the structure to be built and refined (Figures 2A-D, S1F). The  
85 Cep3 homodimer was readily recognised, facilitated by its largely helical structure and the  
86 identification of an approximately two-fold axis, that could also be seen in the 2D classes

87 (Figure S1C). The 2.5 Å crystal structure of the Cep3 homodimer (Purvis and Singleton, 2007)  
88 was fit in the map as a rigid body and this structure is essentially unchanged after refinement  
89 with a final C $\alpha$  RSMD of 1.1 Å. Of the remaining density, the most striking secondary structural  
90 feature is an 8-stranded parallel beta sheet. This is part of a larger solenoid structure,  
91 corresponding to the predicted LRR fold of Ctf13, and comprises 8 LRR motifs (Figure S2A). The  
92 LRR domain is decorated at each end by additional domains (Figures 2B, S2A).

93 Into one of these, the N-terminal BTB/POZ domain of yeast Skp1 (Orlicky et al., 2003) could be  
94 fit as a rigid body. The map included density for an acidic loop that is rarely visible in Skp1  
95 crystal structures (Figure 1F). In typical Skp1-Fbox interactions, the ~30 residues after the  
96 BTB/POZ domain form 2 C-terminal helices ( $\alpha$ 7 &  $\alpha$ 8) that wrap closely around the F-box of the  
97 partner protein, forming a compact structural domain that is conserved in all published Skp1-  
98 Fbox structures to date. However, this canonical Skp1-Fbox structure does not fit in the  
99 CBF3CC $\Delta$ N map. The position of the first helix of the F-box of Ctf13 is not compatible with the  
100 common orientation of Skp1- $\alpha$ 7 and consequently both  $\alpha$ 7 &  $\alpha$ 8 of Skp1 are reoriented by 86°  
101 and 60° respectively (Figures S2B, S2C, S3A, S3B). The F-box is connected to the LRR domain by  
102 a linker subdomain comprising a 3-stranded anti-parallel  $\beta$ -sheet and a long  $\alpha$ -helix (Figure  
103 S2A). The majority of the F-box of Ctf13 is well conserved between Saccharomycetaceae,  
104 therefore this atypical structure is likely to be found in all Skp1-Ctf13 homologues. In addition,  
105 there is an ~50 amino acid insertion between  $\alpha$ 2 and  $\alpha$ 3 of the F-box for which there is no  
106 electron density. Since some of this has weak conservation, it may be structured in the  
107 presence of other binding partners.

108 The remaining density is an  $\alpha$ - $\beta$  subdomain that decorates the C-terminal end of the Ctf13 LRR,  
109 formed by insertions within the last 3 LRRs of Ctf13. This subdomain contacts the previously  
110 mentioned acidic loop of Skp1 such that, overall, the Skp1-Ctf13 heterodimer forms a toroidal  
111 structure in which both the N-terminal F-box and the C-terminal  $\alpha$ - $\beta$  LRR-insertion domain of  
112 Ctf13 associate with either end of Skp1 (Figures 2B, S3C). Other LRR-containing F-box proteins  
113 form toroids, notably both the TIR1 and COI1 plant hormone receptors (Sheard et al., 2010; Tan  
114 et al., 2007), but in these cases the toroid is formed by the LRR domain alone, with Skp1 and  
115 the LRR domains almost perpendicular to each other. By contrast for Skp1-Ctf13, the unusual  
116 Skp1 – F-box interaction forces both Skp1 and Ctf13 into the same plane (Figures 2B, S2D).

117 The Ctf13-Skp1 heterodimer forms the left side of the horseshoe, and makes extensive  
118 contacts with the base, formed by the ‘proximal’ monomer of the Cep3 homodimer (Figures 2A-  
119 D, S3D-F). This interface includes density for part of a loop in Cep3, from residues 330 to 339  
120 not previously visible in the crystal structures. The ‘distal’ monomer of the Cep3 dimer forms  
121 the remaining side of the horseshoe (Figures 2A-D). This arrangement positions the (Cep3 $\Delta$ N)<sub>2</sub>  
122 N-termini, and consequently the truncated binuclear zinc cluster domains, at opposite ends of  
123 the channel created by the horseshoe. The position of Ctf13 relative to (Cep3 $\Delta$ N)<sub>2</sub> results in the  
124 channel being considerably narrower next to the N-terminus of the distal Cep3 $\Delta$ N monomer  
125 (Figure 2D).

#### 126 CBF3CCAN channel is the putative binding site for CDEIII

127 Ctf13 and Cep3 line the channel with basic residues that are strongly conserved between  
128 Saccharomycetaceae (Figures 2E-G). In Ctf13 a series of arginine and lysine residues extend like

129 fingers from the inter LRR turns of LRRs 1-6 into this groove (Figure S2E). LRR3 projects two  
130 neighbouring arginines, Arg307 and Arg308, and the latter is positioned directly along the  
131 twofold axis of  $(\text{Cep3}\Delta\text{N})_2$ , at the midpoint between the truncated  $(\text{Cep3}\Delta\text{N})_2$  N-termini (Figure  
132 3A). Additional conserved basic residues from Cep3 $\Delta$ N extend towards the channel from each  
133 Cep3 protomer, including Lys265, Arg273 and Lys364.

134 The charge and conservation within the channel as a whole, and the striking relative orientation  
135 of the arginine residues from neighbouring LRRs in Ctf13, suggested that the channel may  
136 provide the binding site for CEN DNA, with these residues potentially contributing direct  
137 interactions with CDEIII. In order to test this model, we carried out electrophoretic mobility  
138 shift assays. Full length Cep3 binds CDEIII tightly whereas a construct of Cep3 in which the N-  
139 terminal binuclear zinc cluster domains are truncated, Cep3 $\Delta$ N, does not bind CDEIII DNA,  
140 consistent with previous observations (Figure 3B; compare lanes 5-7 and 10) (Purvis and  
141 Singleton, 2007). By contrast CBF3CC $\Delta$ N shows a DNA-gel shift (Figure 3B; compare lanes 2-4  
142 with lanes 5-7) indicating that association with the Skp1-Ctf13 heterodimer significantly  
143 enhances the affinity of Cep3 $\Delta$ N for CDEIII DNA. Since CBF3CC $\Delta$ N has the binuclear zinc cluster  
144 domains of Cep3 truncated, we tested whether the association was sequence-specific. Labelled  
145 CDEIII DNA could be competed with either unlabelled CDEIII DNA or a random DNA duplex of  
146 equal length (Figure 3B; lanes 8&9). Our in vitro data therefore provide conclusive evidence  
147 that the binuclear zinc cluster domains are not required for the association of the CBF3CC  
148 complex with DNA. However the binuclear zinc cluster domains from Cep3 are the sole  
149 determinants of sequence specificity, as the remaining component of the full CBF3 complex,



150 Ndc10, has also been shown to contribute affinity not but specificity to the CDEIII association  
151 (Cho and Harrison, 2011).

152 We atested the contribution of the highly conserved Arg307, Arg308 and Arg330 from Ctf13 to  
153 this interaction. The triple mutation to alanine reduces association of CBF3CC $\Delta$ N with DNA,  
154 consistent with a model in which these residues contribute affinity to DNA-binding (Figure 3C).

## 155 **Discussion**

### 156 Model for CBF3CC association with CDEIII

157 Our results support a model in which CDEIII DNA binds in the deep channel of the CBF3 core  
158 complex. Consistent with this the diameter of the channel accommodates a DNA duplex (Figure  
159 4A).

160 Previous crosslinking data identified crosslinks between Ctf13 and the completely conserved  
161 cytosine at the pseudo-dyad axis, and its neighbouring 3' thymine, on the bottom strand of  
162 CEN3 CDEIII (Espelin et al., 1997) (Figure 4B). Alignment of the pseudo-dyad axis of modelled  
163 CEN3 CDEIII DNA with the twofold axis of Cep3 places the central cytosine in line with the  
164 conserved Arg308 of Ctf13. If the DNA is then oriented such that the most conserved surface of  
165 Ctf13 aligns with the conserved 3' end of CDEIII, the CCG half-site is placed at the narrow point  
166 of the channel (Figure S4A). There is strong sequence conservation between Cep3 and the  
167 binuclear zinc cluster domains of fungal transcription factors with known structure, including  
168 between residues that contribute to half-site recognition (Figure S4D). If the binuclear zinc  
169 cluster of Cep3 is modelled using the prototypical GAL4 crystal structure (Marmorstein et al.,  
170 1992), the narrow gap perfectly accommodates the binuclear zinc cluster domain and orients

171 its C-terminal end towards the N-terminal end of Cep3 $\Delta$ N (Figure S4B). This superposition packs  
172 the binuclear zinc cluster domain against a strongly conserved loop between the 3<sup>rd</sup> and 4<sup>th</sup> LRR  
173 motifs. The equivalent superposition at the other half-site is sterically incompatible (Figure  
174 S4C). However, modelling a bend in CDEIII of 55°, as observed in AFM images of the CBF3  
175 complex bound to CEN DNA, allows the second binuclear zinc cluster domain to be readily  
176 accommodated (Figure 4A). This model places the conserved CCG and TGT half-sites in very  
177 different environments: the former is buried by Ctf13 and Cep3 at the narrow end of the  
178 channel, while the latter is solvent accessible at the open end of the channel. This wide channel  
179 entrance at the TGT half-site suggests that the exact orientation of the bent DNA within the  
180 channel is uncertain, however the presence of other factors, such as Ndc10, is likely to sterically  
181 lock a single conformation.

182 In a recently published similar structure of the CBF3 core complex (Leber et al., 2017), in which  
183 the fold of the Ctf13 component could be partially assigned, but not its sequence, this second  
184 binuclear domain packs in a groove between Ctf13 and Cep3 in a manner that would not allow  
185 binding to the TGT half-site. Since this is not compatible with the observation of crosslinks  
186 between the TGT half-site and Cep3 (Espelin et al., 1997), we suggest that this could be an  
187 inactive conformation for the binuclear zinc cluster domain, and that the presence of DNA may  
188 unlock it from the docked position.

189 Our structure and model explain a wealth of data published over several decades: The  
190 structural asymmetry accounts for observed asymmetric chromosome nondisjunction rates  
191 seen when CDEIII is altered: mutations centred around the CCG half-site cause rates of

192 chromosome loss up to 2 orders of magnitude greater than mutations of the TGT (Hegemann et  
193 al., 1988). Similarly, labelling of the CCG bases is observed to cause significant loss of  
194 association with CBF3 compared with the TGT half-site (Espelin et al., 1997), and genetic results  
195 identify the CCG triplet as the only bases within the CEN whose substitution cannot be  
196 supported in *S. cerevisiae* (Cumberledge and Carbon, 1987; Gaudet and Fitzgerald-Hayes, 1987;  
197 Jehn et al., 1991; McGrew et al., 1986; Ng and Carbon, 1987; Niedenthal et al., 1991).

198 Previous data suggest that the remaining subunit of the CBF3 complex, Ndc10, binds Ctf13  
199 through its N-terminal domain (Cho and Harrison, 2011; Russell et al., 1999). In addition to  
200 highlighting the putative DNA-binding surface within the channel, mapping of conservation  
201 onto the surface of CBF3CC $\Delta$ N indicates a strongly conserved contiguous surface on the outside  
202 of the horseshoe, comprising Skp1 and the structural elements of the expanded Ctf13 F-box, in  
203 particular the 3 stranded antiparallel  $\beta$ -sheet and the fifth  $\alpha$ -helix (Figure S4E). If Ndc10 were to  
204 bind at this surface it would be close to the CDEII proximal end of CDEIII, potentially placing it in  
205 a suitable location for association with Cbf1, a non-essential CDEI-binding protein which has  
206 been shown to associate with the N-terminal domains of Ndc10 (Cho and Harrison, 2011).  
207 Although crosslinking data suggest that Ndc10 binds to the CDEII distal end of CDEIII (Espelin et  
208 al., 1997)<sup>1</sup>, Ndc10 dimerisation could account for the 'spreading' of Ndc10-DNA contacts to  
209 sites downstream of the CCG half-site.

210 Structural homology of Ctf13 suggests an evolutionary link to epigenetic modifications of the  
211 point centromere

212 A search of PDBeFOLD and DALI identifies the histone demethylase KDM2B as the closest  
213 known F-box containing structural homologue of Ctf13 (Figures 4C-D).

214 KDM2B is a human lysine demethylase from the JHDM1 family containing the Jumonji (JmjC)  
215 domain. In general, this family are responsible for inducing transcriptional silencing through  
216 demethylation of H3K36. In lower eukaryotes family members, such as Jhd1 in *S. cerevisiae*,  
217 comprise only the histone lysine demethylation domain while in higher eukaryotes they have  
218 several additional domains that detect or alter epigenetic states (Klose et al., 2006). In humans  
219 these include a zinc finger domain that recognises methylated DNA, and an F-box and LRR  
220 domain that can recruit SCF E3 ubiquitin ligase activity (Han et al., 2016; Wong et al., 2016).

221 Centromeres have been subject to rapid recent evolutionary change, accounting for the wide  
222 diversity in centromere sequences between species. Evidence suggests that the point  
223 centromeres of Saccharomycetaceae evolved from an ancestor with a regional centromere and  
224 the CBF3 complex co-evolved to meet the requirements of genetic specification (Malik and  
225 Henikoff, 2009). The structural homology between Ctf13 and KDM2B may indicate an  
226 evolutionary path for the Skp1-Ctf13 component of CBF3 in budding yeasts, involving the  
227 partition of a KDM2B-like chromatin-associated enzyme in a common ancestor into two  
228 independent genes – the JHDM1 family member, Jhd1, and point centromere-associated Ctf13.  
229 Whether there is a genetic or physical link between the two resultant genes in extant budding  
230 yeasts remains to be determined. Jhd1 has been shown to counter Set2 methylation (Fang et  
231 al., 2007), which is associated with RNA pol II transcription (Kim and Buratowski, 2007; Kwon  
232 and Ahn, 2011; Sein et al., 2015) and suppression of histone exchange (Venkatesh et al., 2012),

233 but to date, no centromeric function has been attributed. By contrast in *S. pombe*, the KDM2B-  
234 homologue Epe1 contributes to centromere function through regulating heterochromatin  
235 boundaries (Trewick et al., 2007). Epe1 may therefore represent an evolutionary intermediate  
236 since it functions to define a regional centromere but, like Jhd1, it is a 'minimal' JHDM1 family  
237 member, comprising only the JmjC domain without additional targeting domains.

238 While structural homology alone is not sufficient to indicate functional analogy, it is tempting to  
239 speculate that the structural homology of Ctf13 with KDM2B may indicate a molecular link  
240 between Ctf13 and epigenetic specification of point centromeres. Such a link has already been  
241 shown to exist for the Ndc10 component of CBF3: Ndc10, the remaining component of CBF3  
242 that is not present in our current structure, associates with the histone chaperone  
243 Scm3/HJURP, thereby recruiting the centromeric histone Cse4 to the point centromere. Ctf13  
244 may therefore also contribute a currently uncharacterised function in epigenetic specification  
245 of the budding yeast point centromere.

## 246 **Experimental Procedures**

### 247 **Protein expression and purification**

248 The yeast expression system was a gift from Dr. Kiyoshi Nagai. His-tagged Cep3 and untagged  
249 Ctf13 genes were a gift from Martin Singleton. Our experiments showed that the co-expression  
250 of Sgt1 helps the formation and stability of CBF3CC $\Delta$ N complex therefore we cloned and co-  
251 expressed Sgt1 with CBF3CC $\Delta$ N components. The Sgt1 gene with a C-terminal Strep tag was  
252 subcloned into the modified pRS424 vector containing the Ctf13 gene with a C terminal CBP  
253 tag. The Skp1 gene was subcloned into the modified pRS426 vector containing Cep3 $\Delta$ N (47-608)  
254 with a N-terminal His tag. Mutants were generated by site-directed mutagenesis PCR. Both  
255 plasmids were co-transformed into *S. cerevisiae* yeast strain BCY123 (MAT $\alpha$  pep4::HIS3  
256 prb1::LEU2 bar1::HIS6 lys2::GAL1/10GAL4 can1 ade2 trp1 ura3 his3 leu23,112) by using -Trp, -  
257 Ura selection plates (Yeast Nitrogen Base, Trp and Ura dropout mix (Formedium Ltd., UK), 55  
258 mg/ml adenine, 55 mg/ml L-tyrosine, 2% glucose). Expression of the complex and mutants were  
259 performed in BCY123, as reported. The cells were pre-cultured for 24 hours in selective media  
260 and then inoculated into 24 liter non-selective medium with 2% glucose replaced by 2%  
261 raffinose to a starting OD of 0.25. The expression of complex was induced with 2% galactose for  
262 16 hours at an OD of 0.9-1.0. Pelleted cells were resuspended in 0.3 times the cell volume in  
263 lysis buffer A (50 mM Tris, 500 mM NaCl, 2 mM MgAcetate, 2 mM Imidazole, 4 mM CaCl<sub>2</sub>, 0.2%  
264 Igepal CA-630) supplemented with cOmplete™ EDTA-free Protease Inhibitor Cocktail (Roche)  
265 and frozen as pellets in liquid N<sub>2</sub>. The pellets were lysed using a freezer miller (SPEX Sample  
266 Prep). The complex was purified by Calmodulin resin and eluted by buffer B (10 mM Tris, pH8.0,  
267 500 mM NaCl, 1 mM MgAcetate, 1 mM Imidazole, 4 mM EGTA, 2 mM DTT). Purified fractions

268 were pooled together and loaded onto 1 ml His-Trap column (GE Healthcare), which was pre-  
269 equilibrated with buffer C (20 mM Tris, 500 mM NaCl, 20 mM Imidazole, pH8.0, 10 mM  $\beta$ -  
270 mercaptoethanol). The eluted protein was concentrated by centrifugal ultrafiltration (Amicon  
271 Ultra-15, 10 kDa MWCO, Millipore) and loaded onto Mono Q column (GE Healthcare) after  
272 dilution with low salt buffer D (20 mM Tris, pH8.0, 100 mM NaCl, 2 mM DTT, 5 mM EDTA, 10%  
273 glycerol). The complex fractions were pooled and concentrated before loading onto a Superdex  
274 200 5/150 GL (GE Healthcare) pre-equilibrated with S200 buffer (15 mM Tris, 200 mM NaCl, 2  
275 mM DTT). The peak fraction was used to make EM grids.

#### 276 Cryo-Electron microscopy

277 The sample (0.12 mg/ml for first dataset of CBF3CC $\Delta$ N complex, 0.24 mg/ml for second dataset  
278 of CBF3CC $\Delta$ N complex) was applied to glow-discharged Quantifoil 1.2/1.3 300 mesh grids (Agar  
279 Scientific). Cryo-EM data was acquired on a FEI Titan Krios at 300 keV, equipped with a K2  
280 Summit direct detector and a GIF Quantum energy filter (Gatan). Data collection was  
281 automatically carried out using EPU software (FEI) to record 1236 movies with a defocus range  
282 of -1.6  $\mu$ m to -3.6  $\mu$ m for the first CBF3CC $\Delta$ N dataset and 1101 movies with a defocus range of -  
283 1.0  $\mu$ m to -4.0  $\mu$ m at a magnification of 47170 (1.06  $\text{\AA}$  pixel<sup>-1</sup>) for the second CBF3CC $\Delta$ N  
284 dataset. The total exposure time of 10 s fractionated into 25 frames, a total dose of 46 e<sup>-</sup>  $\text{\AA}$ <sup>-2</sup>  
285 per movie for first dataset and the total exposure time of 15 s fractionated into 40 frames, a  
286 total dose of 60.9 e<sup>-</sup>  $\text{\AA}$ <sup>-2</sup> per movie for second dataset. Movies were aligned using MotionCor2  
287 (Zheng et al., 2017).

#### 288 Image processing and model building

289 CTF parameters were estimated using CTFFIND4 (Rohou and Grigorieff, 2015) and CTF  
290 correction and following image processing were performed using RELION 2.0 (Kimanius et al.,  
291 2016), unless otherwise noted. Resolution is reported using the gold-standard Fourier shell  
292 correlation (FSC) (0.143 criterion) as described (Rosenthal and Henderson, 2003; Scheres and  
293 Chen, 2012) and temperature factors were determined and applied automatically in RELION  
294 2.0. A subset of the initial dataset was picked using an automatically generated Gaussian  
295 reference by Gautomatch (Urnavicius et al., 2015), extracted using a  $200^2$  pixel box and then  
296 subjected to reference-free 2D classification. Some of resulted 2D class averages from different  
297 views were selected to be low-pass filtered to 25 Å and used as references for further  
298 automatic particle picking of the initial dataset. The automatically picked particles were  
299 screened manually followed by reference-free 2D classification, which yields 69,392 particles  
300 for subsequent processing. An ovoid generated from SPIDER (Shaikh et al., 2008) was used as  
301 an initial model for 3D classification. The best 3D class was used to perform a 3D auto-  
302 refinement against all the good particles, resulting a 4.9 Å map. After substitution of the  
303 particles contributing to this map by re-extraction from dose-weighted images calculated by  
304 MotionCor2, a further 3D auto-refinement provided a reconstruction at 4.7 Å overall  
305 resolution. 212,724 particles from the second data set were picked from dose-weighted images  
306 and selected for further processing after reference-free 2D classification. After joining the two  
307 dataset, 282,116 particles were input to 3D classification using an initial 3D reference obtained  
308 by low pass-filtering (50 Å) the reconstruction of 4.7 Å map. Two different conformations of  
309 complex were obtained after 3D classification, with 187, 606 particles in an “open”  
310 conformation and 94, 510 particles in a “closed” conformation. 3D auto-refinement of the 3D



311 classes against the corresponding particles resulted in reconstructions of 4.1 Å map for the  
312 “open” conformation and 4.5 Å map for the “closed” confirmation, respectively. The maps  
313 from refinement were post-processed by RELION and sharpened by a negative B-factor using an  
314 automated procedure resulting in a 3.7 Å reconstruction for the “open” confirmation and 4.1  
315 Å reconstruction for the “closed” conformation. Local resolution was estimated using RELION.  
316 Cep3 (Purvis and Singleton, 2007) and the BTB/POZ domain of Skp1 (Orlicky et al., 2003) were  
317 placed in the map using Chimera. Ctf13 was built *de novo* using Coot (Emsley et al., 2010) in an  
318 early 4 Å map, utilizing secondary structure predictions from both Psipred (Jones, 1999) and  
319 Phyre2 (Mezulis et al., 2015), sequence conservation between common ascomycetes and with  
320 reference to structural preferences for leucine rich repeat domains (Bella et al., 2008).  
321 Sequence alignments were generated using ClustalW (Larkin et al., 2007) and annotated using  
322 ESPript (Gouet et al., 2003). A single round of Real Space Refinement in Phenix was used to  
323 refine geometry (Afonine et al., 2012). Tracing of the main chain was assisted using a 6 Å-  
324 filtered map. This model was then rigid body fit into the final map at 3.7 Å followed by a final  
325 polish in Coot and refinement with a single iteration of Phenix using the Real Space Refinement  
326 protocol. Secondary structure restraints were initially generated using the Cep3 and Skp1  
327 crystal structures and, for Ctf13, from within Phenix, with manual editing where deviations  
328 from the crystal structures was evident. In order to validate the model an FSCfree and FSCwork  
329 were calculated. Using Phenix, the atomic coordinates of the final model were randomly shifted  
330 by 0.5 Å and subsequently real space refined against one unmasked half map (the ‘working’  
331 map). The resulting model was converted to a map and an FSC calculated between it and both  
332 the working map (FSCwork) and the free half map (FSCfree).

333 Gel electrophoretic mobility shift binding assays (EMSA)

334 Protein-DNA interactions were evaluated by EMSA. 24 pmol doubly labeled 33 bp CDEIII dsDNA  
335 (AATATTAGTGTATTTGATTTCCGAAAGTTAAA) were mixed with different amounts of protein  
336 with the indicated ratio of DNA: protein in the reaction buffer (25 mM Hepes, pH8.0, 200 mM  
337 KCl, 2 mM DTT, 10% glycerol, 0.02% NP-40, 10 mM MgCl<sub>2</sub>, 10 μM ZnCl<sub>2</sub>). For competition  
338 EMSA, the unlabeled competitor DNAs were 50 times more concentrated than the labeled DNA.  
339 The mixtures were incubated at room temperature for 45 minutes and resolved on a 3%-12%  
340 Bis-Tris Native polyacrylamide gel at a constant voltage of 150 V at 4°C in 1x Native PAGE  
341 running buffer for 110 minutes. After electrophoresis, the gel was scanned using an FLA-3000  
342 fluorescent image analyzer (Fujifilm) excited with a 490nm laser.

343 **Author contributions**

344 Conceptualisation: C.K.V.; Methodology: C.K.V., W.Z. and N.L.; Investigation: W.Z., N.L. & S.M.;

345 Writing-original draft: C.K.V. & W.Z.; Writing –review & editing: C.K.V., W.Z. & N.L.;

346 Visualisation: C.K.V.; Supervision: C.K.V. & N.L.; Funding acquisition: C.K.V.

347 **Acknowledgements**

348 We are grateful to: Martin Singleton for the Ctf13 and Cep3 genes; Kiyoshi Nagai for sharing his

349 yeast expression system and helping us test expression of our constructs; Dan Clare, Corey

350 Hecksel and Alistair Siebert for data collection at eBIC. W.Z. and C.K.V. were funded by the

351 BBSRC.

352 **Declaration of Interests**

353 The authors declare no competing financial interests

354 **Figures**

**FIGURE 1**

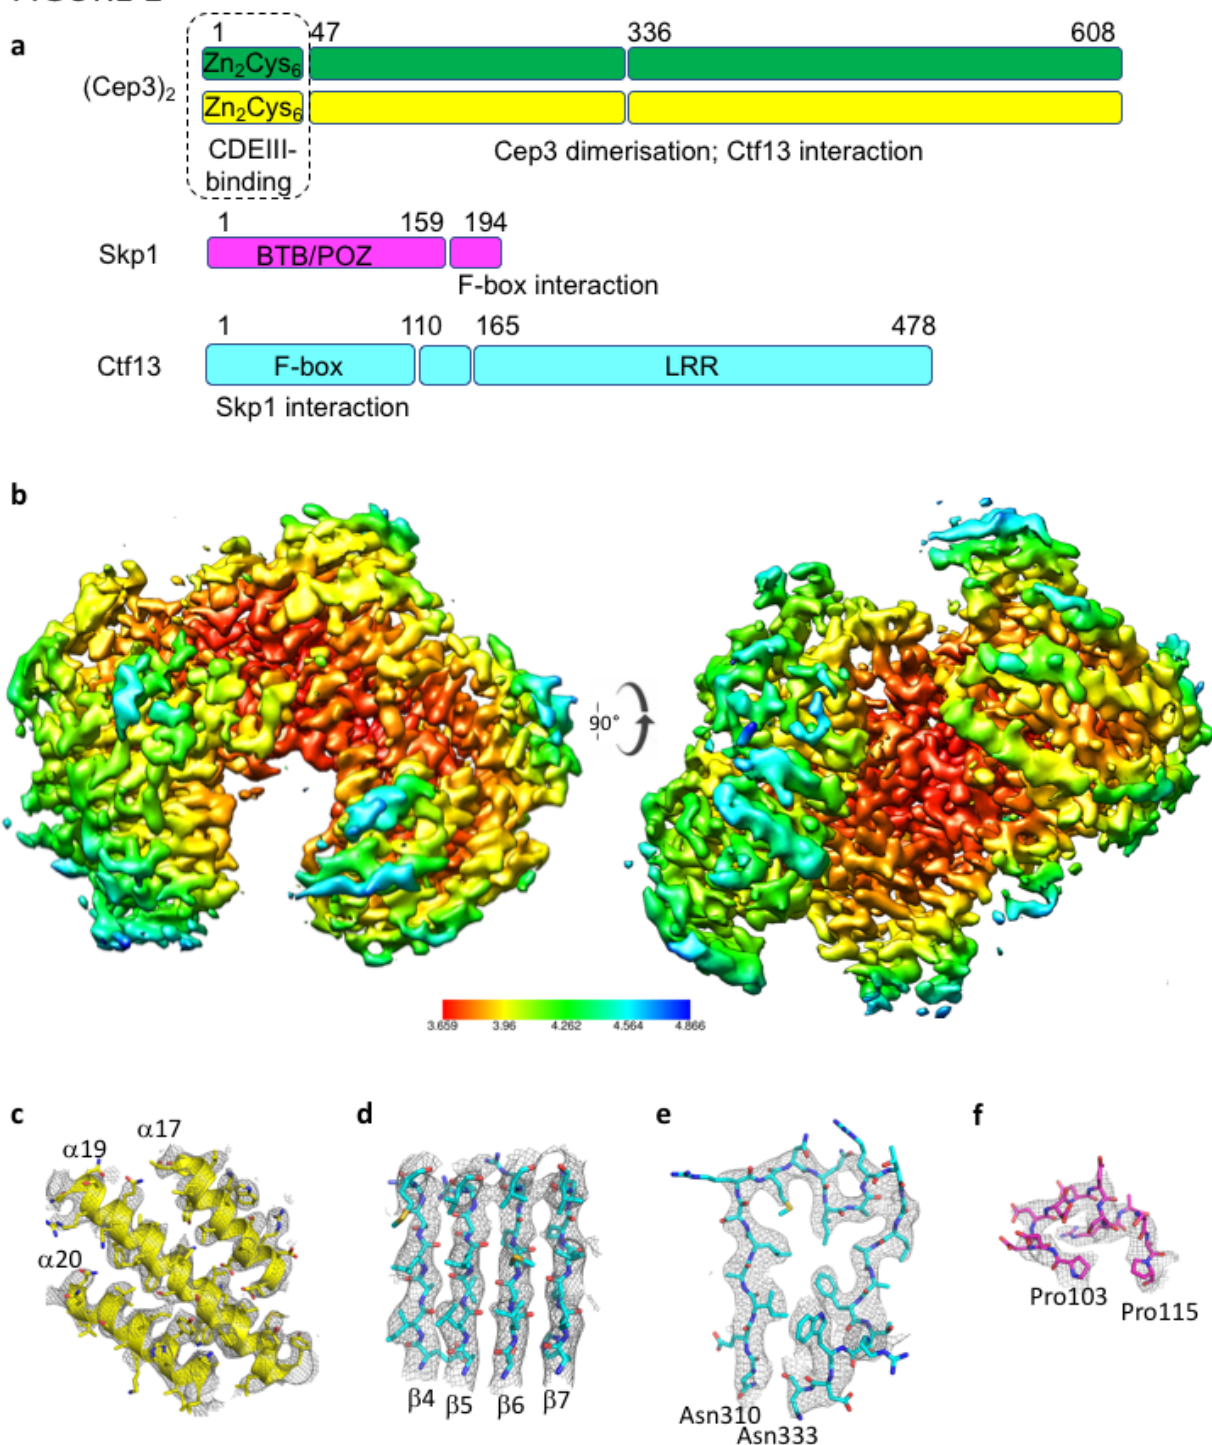

355

356 **Figure 1: Cryo-EM reconstruction of the CBF3CCΔN (A) Components of CBF3CCΔN, annotated**

357 with domain boundaries and architecture. Known binding-partners are indicated below the  
358 relevant domains. Domains not included in the construct used for structure determination are  
359 boxed with a dotted line. (B) Structure of CBF3CC $\Delta$ N coloured by local resolution. The overall  
360 resolution estimate is 3.7 Å. Representative electron density for (C) helices from Cep3 $\Delta$ N, (D) 4  
361 beta-strands of the LRR beta-sheet from Ctf13, (E) LRR4 from Ctf13, (F) an acidic loop in Skp1.

FIGURE 2

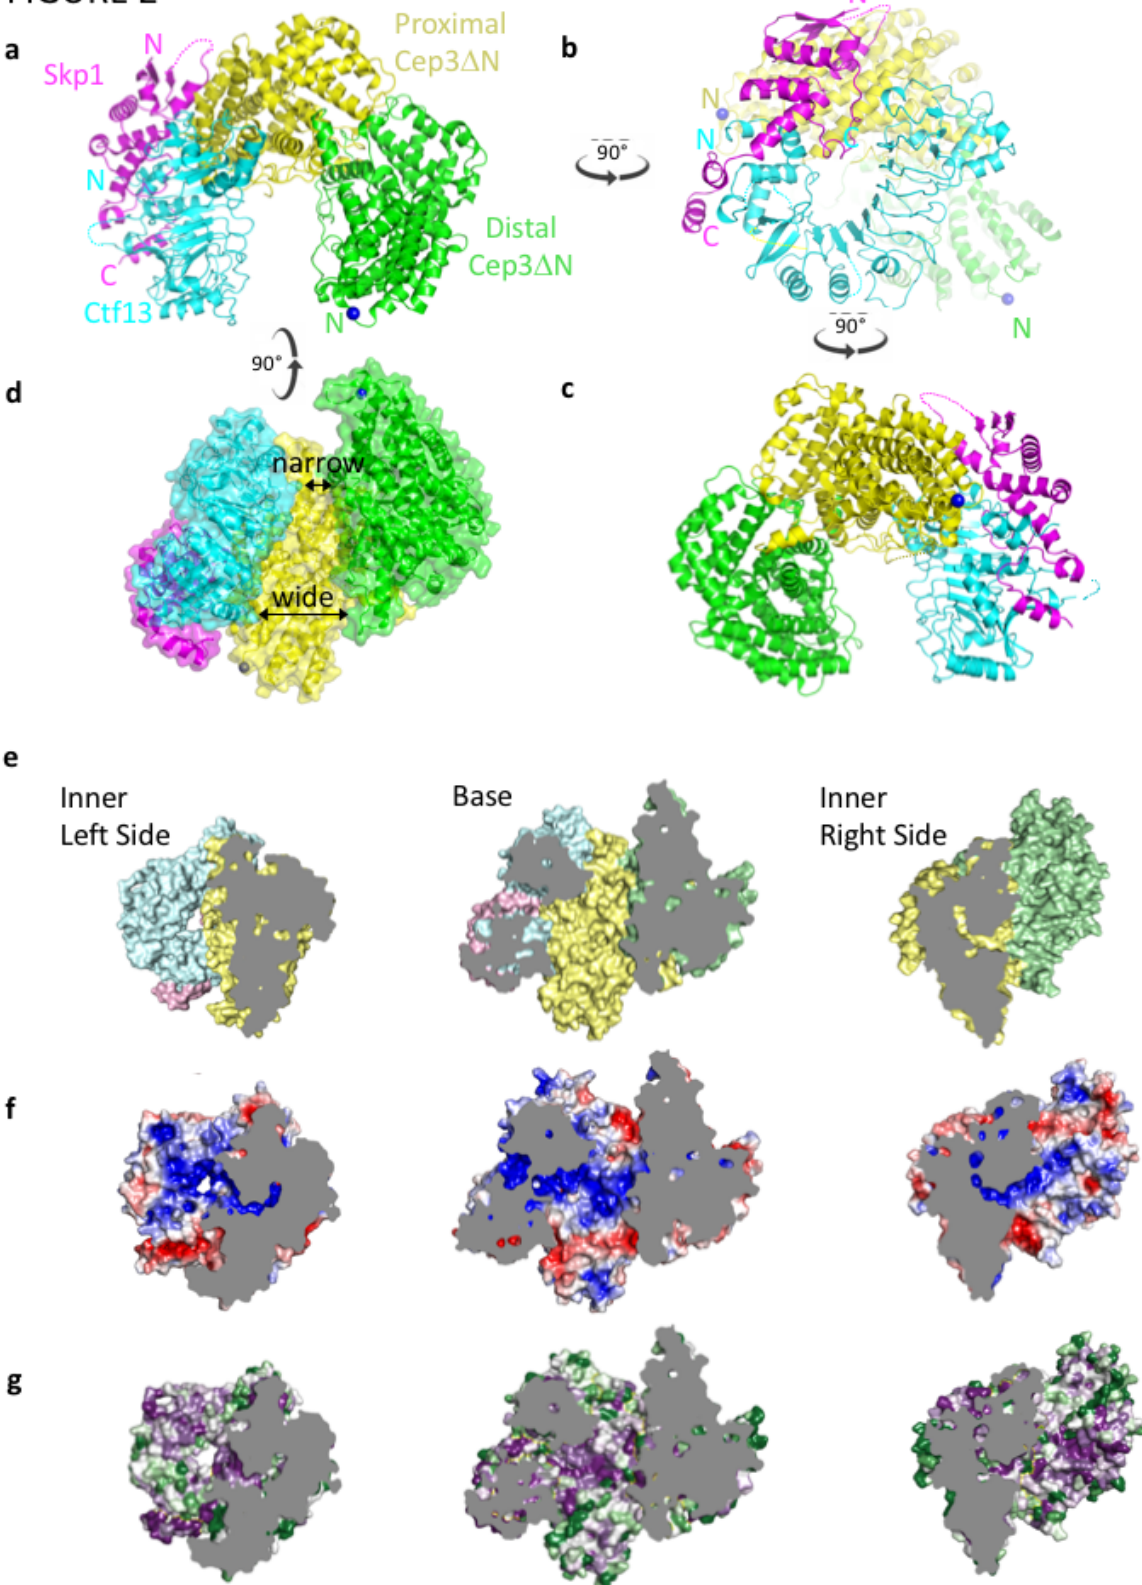

362

363 **Figure 2: Atomic model of CBF3CCΔN (A-D)** The structure of CBF3CCΔN with Ctf13 (cyan), Skp1

364 (pink) and the Cep3 $\Delta$ N homodimer (yellow and green) showing 4 views each related by 90°.

365 One view (D) highlights variation in the width of the channel. The N-termini of the Cep3 $\Delta$ N

366 homodimer are shown as blue balls.

367 Views of each side of the inner surface of the channel coloured by (E) protein (colour as A-D

368 above), (F) electrostatic potential (from -5 (red) to +5 (blue) TeV) and (G) by conservation

369 (purple-white-green = high-medium-low conservation).

370



## FIGURE 3

a

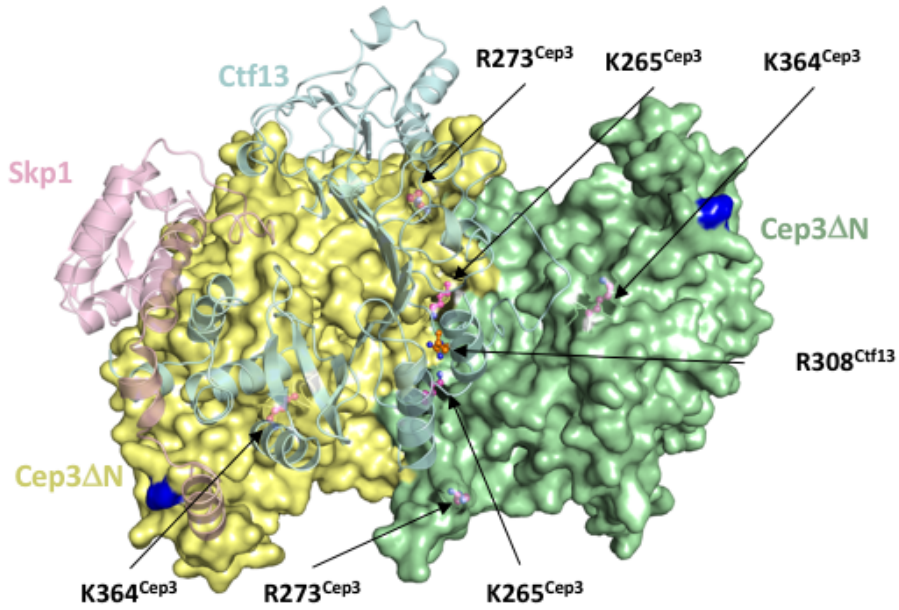

b

| 1                | 2 | 3              | 4 | 5      | 6 | 7              | 8 | 9                  | 10 |
|------------------|---|----------------|---|--------|---|----------------|---|--------------------|----|
| CDEIII alone     |   |                |   |        |   |                |   |                    |    |
| Titrate CBF3CCΔN |   | Titrate Cep3ΔN |   | random |   | Competitor DNA |   | CBF3CCΔN + CDE III |    |
|                  |   |                |   |        |   |                |   |                    |    |
| Cep3 FL + CDEIII |   |                |   |        |   |                |   |                    |    |

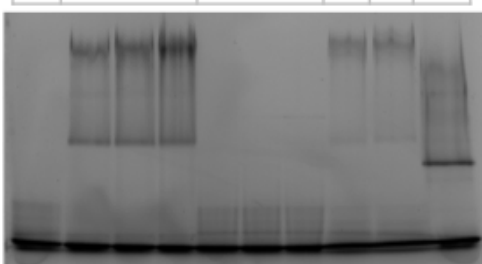

c

| 1                | 2 | 3      | 4 | 5     | 6 | 7     | 8 | 9     | 10 |
|------------------|---|--------|---|-------|---|-------|---|-------|----|
| Protein:DNA      |   |        |   |       |   |       |   |       |    |
| CDEIII DNA alone |   |        |   |       |   |       |   |       |    |
| 0:1              |   | 0.25:1 |   | 0.5:1 |   | 1:1   |   | 2:1   |    |
| 0:1              |   | 0.25:1 |   | 0.5:1 |   | 1:1   |   | 2:1   |    |
| 0.5:1            |   | 1:1    |   | 2:1   |   | 4:1   |   | 0.5:1 |    |
| 1:1              |   | 2:1    |   | 4:1   |   | 0.5:1 |   | 1:1   |    |
| 2:1              |   | 4:1    |   | 0.5:1 |   | 1:1   |   | 2:1   |    |
| 4:1              |   | 0.5:1  |   | 1:1   |   | 2:1   |   | 4:1   |    |
| 0.5:1            |   | 1:1    |   | 2:1   |   | 4:1   |   | 0.5:1 |    |
| 1:1              |   | 2:1    |   | 4:1   |   | 0.5:1 |   | 1:1   |    |
| 2:1              |   | 4:1    |   | 0.5:1 |   | 1:1   |   | 2:1   |    |
| 4:1              |   | 0.5:1  |   | 1:1   |   | 2:1   |   | 4:1   |    |
| 0.5:1            |   | 1:1    |   | 2:1   |   | 4:1   |   | 0.5:1 |    |
| 1:1              |   | 2:1    |   | 4:1   |   | 0.5:1 |   | 1:1   |    |
| 2:1              |   | 4:1    |   | 0.5:1 |   | 1:1   |   | 2:1   |    |
| 4:1              |   | 0.5:1  |   | 1:1   |   | 2:1   |   | 4:1   |    |
| 0.5:1            |   | 1:1    |   | 2:1   |   | 4:1   |   | 0.5:1 |    |
| 1:1              |   | 2:1    |   | 4:1   |   | 0.5:1 |   | 1:1   |    |
| 2:1              |   | 4:1    |   | 0.5:1 |   | 1:1   |   | 2:1   |    |
| 4:1              |   | 0.5:1  |   | 1:1   |   | 2:1   |   | 4:1   |    |

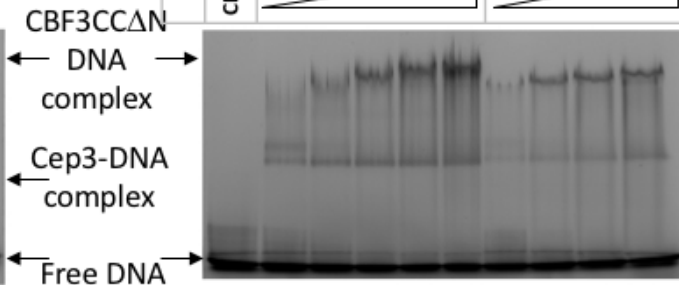

371

372 **Figure 3: CBF3CCΔN channel is the putative binding site for CDEIII (A) View down the two-fold**



373 axis of the Cep3 $\Delta$ N homodimer. Cep3 $\Delta$ N dimer surface is coloured yellow & green; Skp1 (pink)  
374 and Ctf13 (cyan) are semi-transparent and shown as cartoon. R308<sup>Ctf13</sup> lies directly along the  
375 two-fold axis (orange ball and stick). Conserved basic residues in Cep3 are highlighted in  
376 magenta ball and stick. (B) Electrophoretic mobility shift assays performed with (A) 1.6  $\mu$ M  
377 fluorescently-labelled CDEIII DNA and a titration of CBF3CC $\Delta$ N (lanes 2-4) or Cep3 $\Delta$ N (lanes 5-7)  
378 or 6.4  $\mu$ M of full length Cep3 (lane 10). Lanes 8 and 9 show competition of CBF3CC $\Delta$ N binding  
379 with 80  $\mu$ M unlabelled probe. (C) 1.6  $\mu$ M fluorescently-labelled CDEIII DNA with a titration of  
380 CBF3CC $\Delta$ N (lanes 2-6) and CBF3CC $\Delta$ N with Ctf13 mutations R307A-R308A-R330A.

FIGURE 4

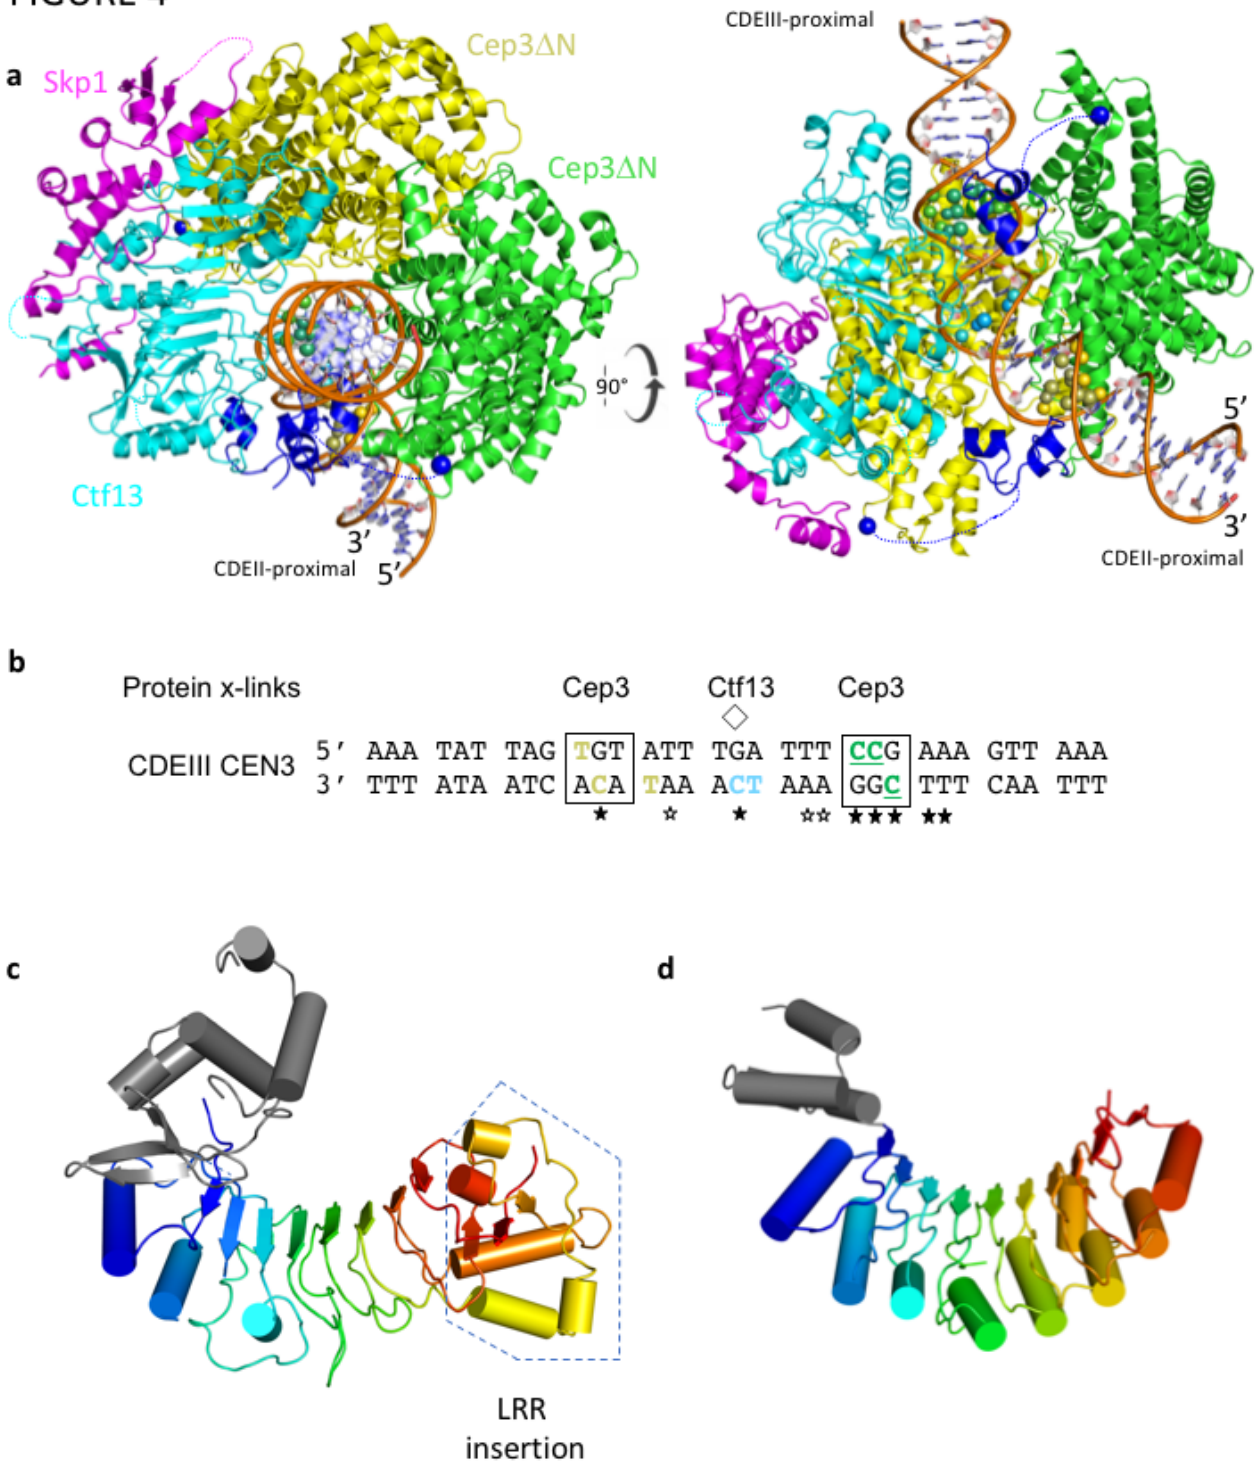

381

382 **Figure 4: CBF3CC $\Delta$ N model bound to CDEIII and structural homology of Ctf13 (A) Model of**

383 CBF3CC $\Delta$ N with CEN3-CDEIII DNA bound in the channel. DNA was modelled with a 55° bend

384 between the half-sites using 3D-DART (van Dijk and Bonvin, 2009). The CCG half-site is coloured  
385 green, the central conserved G is coloured cyan, and the TGT half-site is coloured yellow and  
386 their locations emphasized using ball representation for the ribose and base. The end closest to  
387 CDEII is labelled. The Cep3 binuclear zinc cluster domains (dark blue) are modelled by  
388 superposition of the Gal4-CCG structure (Marmorstein et al., 1992) (PDB 1d66) on each half-  
389 site. (B) The sequence of CEN3 CDEIII. Half-sites of the pseudo-palindrome are boxed. The  
390 pseudo-dyad axis is marked with a diamond. Completely conserved and strongly conserved  
391 bases (15 of 16 chromosomes) are indicated with filled or empty stars respectively. Bases that  
392 interact with Cep3 or Ctf13 are highlighted in colour; bases whose labelling interfered with  
393 CBF3 binding are underlined. Cartoon representations of (C) Ctf13 and its closest structural F-  
394 box containing homologue (D) human KDM2B (PDB 5jh5). The LRR domains are coloured  
395 rainbow and the F-box is coloured grey.

## 396 **References**

- 397 Afonine, P.V., Grosse-Kunstleve, R.W., Echols, N., Headd, J.J., Moriarty, N.W., Mustyakimov, M.,  
398 Terwilliger, T.C., Urzhumtsev, A., Zwart, P.H., Adams, P.D., 2012. Towards automated  
399 crystallographic structure refinement with phenix.refine. *Acta Cryst* (2012). D68, 352-367  
400 [doi:10.1107/S0907444912001308] 1–16. doi:10.1107/S0907444912001308
- 401 Bella, J., Hindle, K.L., McEwan, P.A., Lovell, S.C., 2008. The leucine-rich repeat structure. *Cell*.  
402 *Mol. Life Sci.* 65, 2307–2333. doi:10.1007/s00018-008-8019-0
- 403 Bellizzi, J.J., III, Sorger, P.K., Harrison, S.C., 2007. Crystal Structure of the Yeast Inner  
404 Kinetochore Subunit Cep3p. *Structure* 15, 1422–1430. doi:10.1016/j.str.2007.09.008
- 405 Camahort, R., Li, B., Florens, L., Swanson, S.K., Washburn, M.P., Gerton, J.L., 2007. Scm3 Is  
406 Essential to Recruit the Histone H3 Variant Cse4 to Centromeres and to Maintain a  
407 Functional Kinetochore. *Molecular Cell* 26, 853–865. doi:10.1016/j.molcel.2007.05.013
- 408 Cho, U.S., Harrison, S.C., 2011. Ndc10 is a platform for inner kinetochore assembly in budding  
409 yeast. *Nature Structural & Molecular Biology* 19, 48–55. doi:10.1038/nsmb.2178
- 410 Cumberledge, S., Carbon, J., 1987. Mutational analysis of meiotic and mitotic centromere  
411 function in *Saccharomyces cerevisiae*. *Genetics* 117, 203–212.
- 412 Emsley, P., Lohkamp, B., Scott, W.G., Cowtan, K., 2010. Features and development of Coot. *Acta*  
413 *Crystallogr D Biol Crystallogr* 66, 486–501. doi:10.1107/S0907444910007493
- 414 Espelin, C.W., Kaplan, K.B., Sorger, P.K., 1997. Probing the architecture of a simple kinetochore  
415 using DNA-protein crosslinking. *The Journal of Cell Biology* 139, 1383–1396.
- 416 Fang, J., Hogan, G.J., Liang, G., Lieb, J.D., Zhang, Y., 2007. The *Saccharomyces cerevisiae* histone  
417 demethylase Jhd1 fine-tunes the distribution of H3K36me2. *Molecular and Cellular Biology*  
418 27, 5055–5065. doi:10.1128/MCB.00127-07
- 419 Gaudet, A., Fitzgerald-Hayes, M., 1987. Alterations in the adenine-plus-thymine-rich region of  
420 CEN3 affect centromere function in *Saccharomyces cerevisiae*. *Molecular and Cellular*  
421 *Biology* 7, 68–75. doi:10.1128/MCB.7.1.68
- 422 Gouet, P., Robert, X., Courcelle, E., 2003. ESPript/ENDscript: Extracting and rendering sequence  
423 and 3D information from atomic structures of proteins. *Nucleic Acids Res.* 31, 3320–3323.  
424 doi:10.1093/nar/gkg556
- 425 Han, X.-R., Zha, Z., Yuan, H.-X., Feng, X., Xia, Y.-K., Lei, Q.-Y., Guan, K.-L., Xiong, Y., 2016.  
426 KDM2B/FBXL10 targets c-Fos for ubiquitylation and degradation in response to mitogenic  
427 stimulation. *Oncogene* 35, 4179–4190. doi:10.1038/onc.2015.482
- 428 Hegemann, J.H., Shero, J.H., Cottarel, G., Philippsen, P., Hieter, P., 1988. Mutational analysis of  
429 centromere DNA from chromosome VI of *Saccharomyces cerevisiae*. *Molecular and Cellular*  
430 *Biology* 8, 2523–2535.
- 431 Ho, K.-H., Tsuchiya, D., Oliger, A.C., Lacefield, S., 2014. Localization and function of budding  
432 yeast CENP-A depends upon kinetochore protein interactions and is independent of  
433 canonical centromere sequence. *Cell Reports* 9, 2027–2033.  
434 doi:10.1016/j.celrep.2014.11.037
- 435 Jehn, B., Niedenthal, R., Hegemann, J.H., 1991. In vivo analysis of the *Saccharomyces cerevisiae*  
436 centromere CDEIII sequence: requirements for mitotic chromosome segregation. *Molecular*  
437 *and Cellular Biology* 11, 5212–5221.
- 438 Jones, D.T., 1999. Protein secondary structure prediction based on position-specific scoring

- 439 matrices. *Journal of Molecular Biology* 292, 195–202. doi:10.1006/jmbi.1999.3091
- 440 Kim, T., Buratowski, S., 2007. Two *Saccharomyces cerevisiae* JmjC Domain Proteins
- 441 Demethylate Histone H3 Lys36 in Transcribed Regions to Promote Elongation. *Journal of*
- 442 *Biological Chemistry* 282, 20827–20835. doi:10.1074/jbc.M703034200
- 443 Kimanius, D., Forsberg, B.O., Scheres, S.H.W., Lindahl, E., 2016. Accelerated cryo-EM structure
- 444 determination with parallelisation using GPUs in RELION-2. *eLife* 5, e18722.
- 445 doi:10.7554/eLife.18722.001
- 446 Klose, R.J., Kallin, E.M., Zhang, Y., 2006. JmjC-domain-containing proteins and histone
- 447 demethylation. *Nature Reviews Genetics* 7, 715–727. doi:10.1038/nrg1945
- 448 Kwon, D.-W., Ahn, S.H., 2011. Role of yeast JmjC-domain containing histone demethylases in
- 449 actively transcribed regions. *Biochemical and Biophysical Research Communications* 410,
- 450 614–619. doi:10.1016/j.bbrc.2011.06.039
- 451 Larkin, M.A., Blackshields, G., Brown, N.P., Chenna, R., McGettigan, P.A., McWilliam, H.,
- 452 Valentin, F., Wallace, I.M., Wilm, A., Lopez, R., 2007. Clustal W and Clustal X version 2.0.
- 453 *Bioinformatics* 23, 2947–2948.
- 454 Leber, V., Nans, A., Singleton, M.R., 2017. Structural basis for assembly of the CBF3 kinetochore
- 455 complex. *The EMBO Journal*. doi:10.15252/embj.201798134
- 456 Lechner, J., 1994. A zinc finger protein, essential for chromosome segregation, constitutes a
- 457 putative DNA binding subunit of the *Saccharomyces cerevisiae* kinetochore complex, Cbf3.
- 458 *The EMBO Journal* 13, 5203–5211.
- 459 Lechner, J., Carbon, J., 1991. A 240 kd multisubunit protein complex, CBF3, is a major
- 460 component of the budding yeast centromere. *Cell* 64, 717–725.
- 461 doi:10.2307/30084424?ref=search-gateway:5d5921da60739017422a27e6038b9d1c
- 462 MacPherson, S., Laroche, M., Turcotte, B., 2006. A Fungal Family of Transcriptional
- 463 Regulators: the Zinc Cluster Proteins. *Microbiology and Molecular Biology Reviews* 70, 583–
- 464 604. doi:10.1128/MMBR.00015-06
- 465 Malik, H.S., Henikoff, S., 2009. Major Evolutionary Transitions in Centromere Complexity. *Cell*
- 466 138, 1067–1082. doi:10.1016/j.cell.2009.08.036
- 467 Marmorstein, R., Carey, M., Ptashne, M., Harrison, S.C., 1992. DNA recognition by GAL4:
- 468 structure of a protein-DNA complex. 356, 408–414. doi:10.1038/356408a0
- 469 McGrew, J., Diehl, B., Fitzgerald-Hayes, M., 1986. Single base-pair mutations in centromere
- 470 element III cause aberrant chromosome segregation in *Saccharomyces cerevisiae*.
- 471 *Molecular and Cellular Biology* 6, 530–538.
- 472 Mezulis, S., Yates, C.M., Wass, M.N., Sternberg, M.J.E., Kelley, L.A., 2015. The Phyre2 web portal
- 473 for protein modeling, prediction and analysis. *Nat Protoc* 10, 845–858.
- 474 doi:10.1038/nprot.2015-053
- 475 Ng, R., Carbon, J., 1987. Mutational and in vitro protein-binding studies on centromere DNA
- 476 from *Saccharomyces cerevisiae*. *Molecular and Cellular Biology* 7, 4522–4534.
- 477 doi:10.1128/MCB.7.12.4522
- 478 Niedenthal, R., Stoll, R., Hegemann, J.H., 1991. In vivo characterization of the *Saccharomyces*
- 479 *cerevisiae* centromere DNA element I, a binding site for the helix-loop-helix protein CPF1.
- 480 *Molecular and Cellular Biology* 11, 3545–3553.
- 481 Orlicky, S., Tang, X., Willems, A., Tyers, M., Sicheri, F., 2003. Structural basis for
- 482 phosphodependent substrate selection and orientation by the SCFCdc4 ubiquitin ligase. *Cell*

- 483 112, 243–256.
- 484 Perriches, T., Singleton, M.R., 2012. Structure of Yeast Kinetochores Ndc10 DNA-binding Domain  
485 Reveals Unexpected Evolutionary Relationship to Tyrosine Recombinases. *Journal of*  
486 *Biological Chemistry* 287, 5173–5179. doi:10.1074/jbc.C111.318501
- 487 Purvis, A., Singleton, M.R., 2007. Insights into kinetochores–DNA interactions from the structure  
488 of Cep3A. *EMBO reports* 9, 56–62. doi:10.1038/sj.embor.7401139
- 489 Rodrigo-Brenni, M.C., Thomas, S., Bouck, D.C., Kaplan, K.B., 2004. Sgt1p and Skp1p modulate  
490 the assembly and turnover of CBF3 complexes required for proper kinetochores function.  
491 *Molecular and Cellular Biology* 15, 3366–3378. doi:10.1091/mbc.E03-12-0887
- 492 Rohou, A., Grigorieff, N., 2015. CTFIND4: Fast and accurate defocus estimation from electron  
493 micrographs. *Journal of Structural Biology* 1–6. doi:10.1016/j.jsb.2015.08.008
- 494 Rosenthal, P.B., Henderson, R., 2003. Optimal Determination of Particle Orientation, Absolute  
495 Hand, and Contrast Loss in Single-particle Electron Cryomicroscopy. *Journal of Molecular*  
496 *Biology* 333, 721–745. doi:10.1016/j.jmb.2003.07.013
- 497 Russell, I.D., Grancell, A.S., Sorger, P.K., 1999. The Unstable F-box Protein p58-Ctf13 Forms the  
498 Structural Core of the CBF3 Kinetochores Complex. *The Journal of Cell Biology* 145, 933–950.
- 499 Scheres, S.H.W., Chen, S., 2012. Prevention of overfitting in cryo-EM structure determination.  
500 *Nat Meth* 9, 853–854. doi:10.1038/nmeth.2115
- 501 Sein, H., Värvi, S., Kristjuhan, A., 2015. Distribution and maintenance of histone H3 lysine 36  
502 trimethylation in transcribed locus. *PLoS ONE* 10, e0120200.  
503 doi:10.1371/journal.pone.0120200
- 504 Shaikh, T.R., Gao, H., Baxter, W.T., Asturias, F.J., Boisset, N., Leith, A., Frank, J., 2008. SPIDER  
505 image processing for single-particle reconstruction of biological macromolecules from  
506 electron micrographs. *Nat Protoc* 3, 1941–1974. doi:10.1038/nprot.2008.156
- 507 Sheard, L.B., Tan, X., Mao, H., Withers, J., Ben-Nissan, G., Hinds, T.R., Kobayashi, Y., Hsu, F.-F.,  
508 Sharon, M., Browse, J., He, S.Y., Rizo, J., Howe, G.A., Zheng, N., 2010. Jasmonate perception  
509 by inositol-phosphate-potentiated COI1-JAZ co-receptor 468, 400–405.  
510 doi:10.1038/nature09430
- 511 Tan, X., Calderon-Villalobos, L.I.A., Sharon, M., Zheng, C., Robinson, C.V., Estelle, M., Zheng, N.,  
512 2007. Mechanism of auxin perception by the TIR1 ubiquitin ligase 446, 640–645.  
513 doi:10.1038/nature05731
- 514 Treweek, S.C., Minc, E., Antonelli, R., Urano, T., Allshire, R.C., 2007. The JmjC domain protein  
515 Epe1 prevents unregulated assembly and disassembly of heterochromatin. *The EMBO*  
516 *Journal* 26, 4670–4682. doi:10.1038/sj.emboj.7601892
- 517 Urnavicius, L., Zhang, K., Diamant, A.G., Motz, C., Schlager, M.A., Yu, M., Patel, N.A., Robinson,  
518 C.V., Carter, A.P., 2015. The structure of the dynactin complex and its interaction with  
519 dynein. *Science* 347, 1441–1446. doi:10.1126/science.aaa4080
- 520 van Dijk, M., Bonvin, A.M.J.J., 2009. 3D-DART: a DNA structure modelling server. *Nucleic Acids*  
521 *Res.* 37, W235–W239. doi:10.1093/nar/gkp287
- 522 Venkatesh, S., Smolle, M., Li, H., Gogol, M.M., Saint, M., Kumar, S., Natarajan, K., Workman, J.L.,  
523 2012. Set2 methylation of histone H3 lysine 36 suppresses histone exchange on transcribed  
524 genes. *Nature* 489, 452–455. doi:10.1038/nature11326
- 525 Verdaasdonk, J.S., Bloom, K., 2011. Centromeres: unique chromatin structures that drive  
526 chromosome segregation. *Nat. Rev. Mol. Cell Biol.* 12, 320–332. doi:10.1038/nrm3107



527 Wong, S.J., Gearhart, M.D., Taylor, A.B., Nanyes, D.R., Ha, D.J., Robinson, A.K., Artigas, J.A., Lee,  
528 O.J., Demeler, B., Hart, P.J., Bardwell, V.J., Kim, C.A., 2016. KDM2B Recruitment of the  
529 Polycomb Group Complex, PRC1.1, Requires Cooperation between PCGF1 and BCORL1.  
530 *Structure* 24, 1795–1801. doi:10.1016/j.str.2016.07.011  
531 Zheng, S.Q., Palovcak, E., Armache, J.-P., Verba, K.A., Cheng, Y., Agard, D.A., 2017. MotionCor2:  
532 anisotropic correction of beam-induced motion for improved cryo-electron microscopy. *Nat*  
533 *Meth* 14, 331–332. doi:10.1038/nmeth.4193  
534

535

536
